# Supplementary material
Source: Springer Nature journal article supplement (https://www.springermedizin.de/resource/supplementary/12879_2012_2418_MOESM1_ESM.pdf/9444534)

**Adults (more than  
14years)**

**28%**

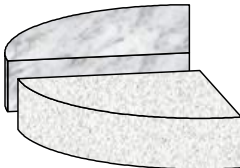

**Children over 5  
years**

**26%**

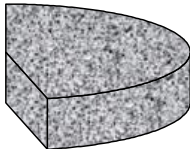

**Children under 5  
years**

**46%**

Supplement: MOESM1 [file 9444534]
